# Supplementary material for: Ara h 2 cross-linking catalyzed by MTGase decreases its allergenicity
Source: Royal Society of Chemistry journal article supplement (doi:10.1039/c6fo01365a), 2017-01-01
Supplement: c6fo01365a1.pdf [file c6fo01365a1.pdf]

## Supplementary Information

**Table S-1 Information of peanut allergic patients**

| Code | Gender | Age   | Clinical symptoms | Total IgE Level (IU/mL) | Specific IgE Level (IU/mL) |
|------|--------|-------|-------------------|-------------------------|----------------------------|
| 1    | male   | 23y   | Unrecorded        | >200                    | 2.8                        |
| 2    | male   | 8y    | Urticaria         | >200                    | 4.8                        |
| 3    | male   | 23y   | Urticaria         | >200                    | 5.8                        |
| 4    | female | 10y   | Allergic rhinitis | >200                    | 2.1                        |
| 5    | male   | 5y    | Unrecorded        | >200                    | 2.6                        |
| 6    | male   | 56y   | Eczema            | >200                    | 2.0                        |
| 7    | male   | 49y   | Chronic urticaria | <100                    | >100                       |
| 8    | female | 33y   | Chronic urticaria | >200                    | 6.7                        |
| 9    | female | 50y   | Unrecorded        | >200                    | 3.8                        |
| 10   | male   | 3m12d | Eczema            | 138                     | 3.5                        |
| 11   | male   | 5m5d  | Unrecorded        | 744                     | 17.5                       |
| 12   | female | 3y4m  | Pneumonia         | 136                     | 3.5                        |

### Content of free amine

The content of free amine groups ( $\alpha$ - and  $\epsilon$ -amino groups) in each reaction system was quantified by Ortho-Phthaldialdehyde (OPA) absorption. Untreated Ara h 2, reduced Ara h 2 and RC-Ara h 2 were included in this study. Shown in figure S-1, after reducing by  $12.50 \times 10^{-5}$  g/mL of DTT, the number of free amine groups (include  $\alpha$ - and  $\epsilon$ -amino groups) was found increased by 38.2%. After cross-linking, the content of free amine groups was decreased by 16.2% compared with reduced Ara h 2.

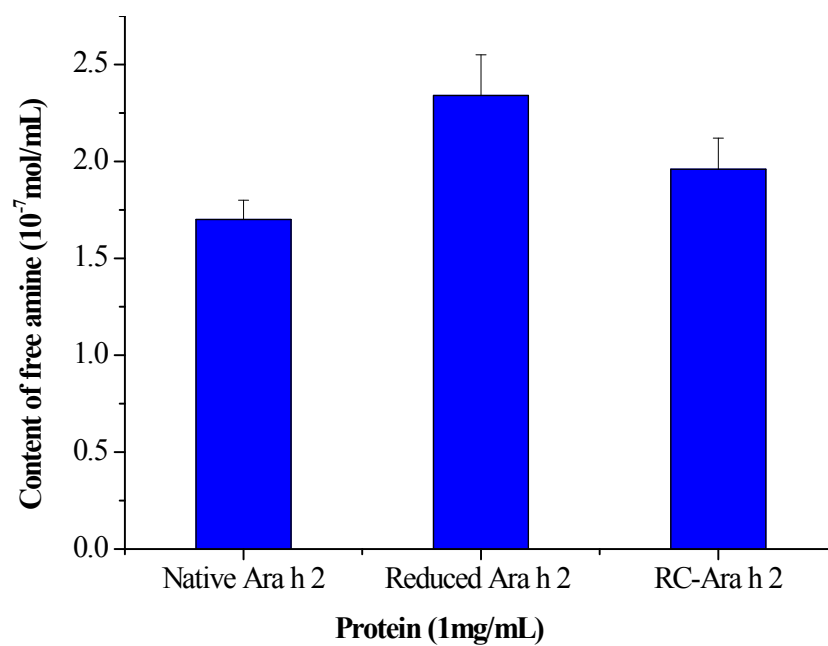

Figure S-1. The content of free amine group in each protein solution was determinate by OPA method, RC-Ara h 2 was reduced and cross-linked Ara h 2.
